# Supplementary material
Source: publisher site journal article supplement (https://www.dovepress.com/article/479463)
Supplement: Supplementary file 1 [file get_supplementary_file.php]

**Supplementary Data**

**2,2’- Bipyridine Derivatives exert anticancer effects by inducing apoptosis in Hepatocellular Carcinoma (HepG2) cells**

Priyanka1,2, Somdutt Mujwar3, Ram Bharti1,2, Thakur Gurjeet Singh3 and Neeraj Khatri1,2*

1IMTech Centre for Animal Resources and Experimentation (iCARE), CSIR-Institute of Microbial Technology (CSIR-IMTECH), Sector 39-A, Chandigarh-160036, India

2Academy of Scientific and Innovative Research (AcSIR), Ghaziabad-201002, India

3Chitkara College of Pharmacy, Chitkara University, Punjab - 140401, India.

*Corresponding author-

Neeraj Khatri

Email: [neeraj@imtech.res.in](mailto:neeraj@imtech.res.in)

**Cell viability Assay**

Cell viability was assessed using 2,2’-Bipy derivatives at different time periods ranging from 12-48 h. Initially, four different concentrations were tested up to 24 h, and after that assay was performed. The MTT assay showed a decrease in cell viability over 12 hours, 24, and 48 hours when exposed to 2,2'-Bipy derivatives. At 12 hours, there was a slight decrease, with higher concentrations causing a reduction. After 24 hours, the decrease became more pronounced, with increased reductions. At 48 hours, six concentrations showed a dose-dependent decrease, with the highest concentration causing a significant reduction in viability of cells (in the main manuscript).


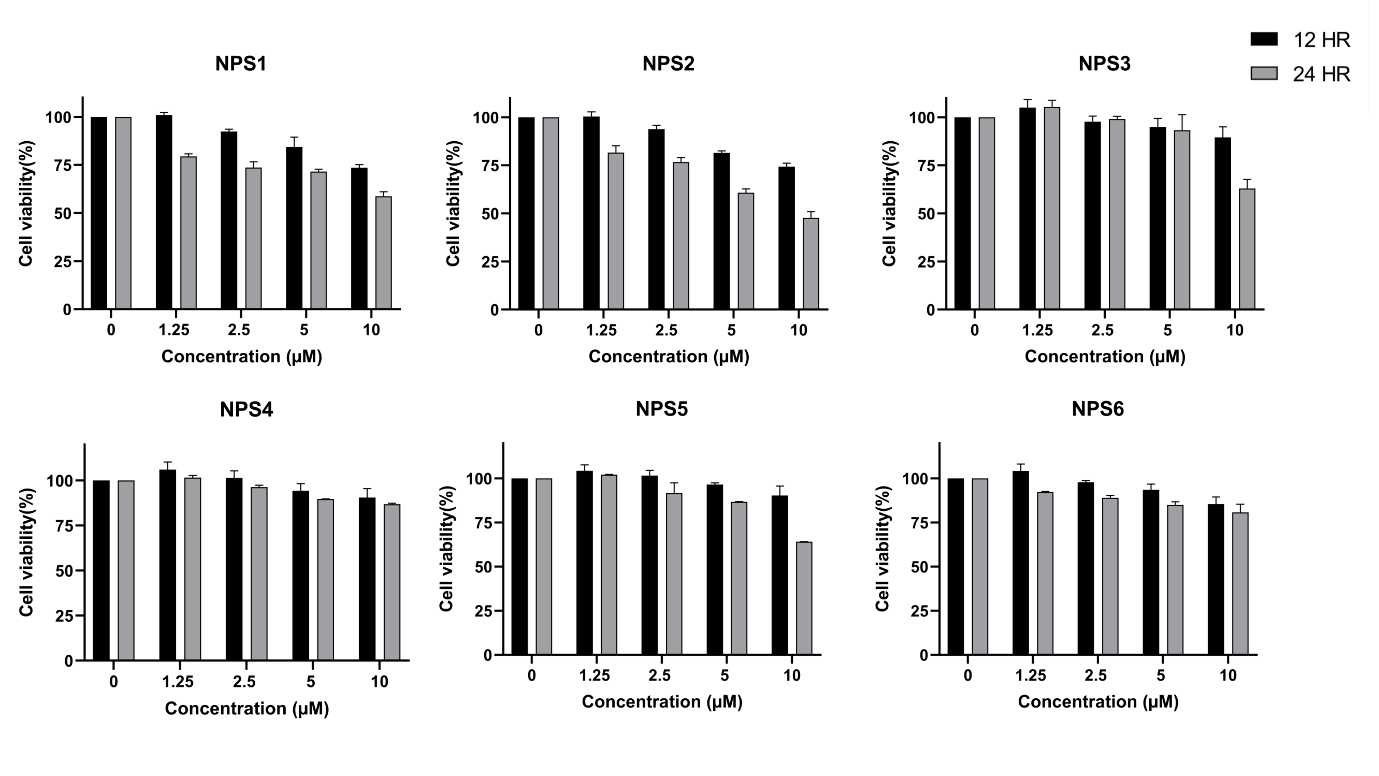


**Figure S1.** Effects of various doses of the derivatives NPS (1-6) on the cell viability of HepG2 cells. The total percentage of cells was measured using an MTT assay. A dose-dependent and time-dependent decrease was observed in cell viability after treatment at 12 and 24 h.
